# Supplementary material
Source: Research Square preprint supplement (doi:10.21203/rs.3.rs-9095268/v1)
Supplement: Supplementary file 1 [file dfe344ea01a7a0c0bf562559.docx]

**Supporting Information**

**Ultrahigh energy storage performance in Pb0.94La0.04Zr0.99Ti0.01O3 ceramics via introducing pyrochlore phase Y2Zr2O7**

*Lei Cao a,b*, *Bowen Huang a,b, Tianci Yang a,b, Chenglong Jiang a,b*, *Ye Zhao a,b,**, *Pei Han a,b,**, *Rong Ma a,b, Chunxiao Lu a,b, Fen Zhao c, Liwen Zhang a,b, and Yong Li a,b,**

*a Inner Mongolia Key Laboratory of Advanced Ceramic Materials and Devices, School of Materials Science and Engineering, Inner Mongolia University of Science and Technology, Baotou 014010, China.*

*b Key Laboratory of Green Extraction and Efficient Utilization of Light Rare-Earth Resources (Inner Mongolia University of Science and Technology), Ministry of Education, Baotou 014010, China.*

*c Baotou Zhongke Investment Management Co., Ltd, Baotou, 014060, China*

*Corresponding authors.

*E-mail address*: yzhao@imust.edu.cn (Ye Zhao), solidking@163.com (Pei Han), and liyong3062545@126.com (Yong Li)

|  | PLZT | PLZT- 4 wt%Y2O3 | PLZT- 4 wt%Y2O3 |
| --- | --- | --- | --- |
|  | Pba2 | Pba2 | Fd-3m |
| a | 5.86 | 5.86 | 10.3347 |
| b | 11.73 | 11.75 | 10.3347 |
| c | 8.22 | 8.23 | 10.3347 |
| V | 565.43 | 566.78 | 1103.814 |

**Fig. S1.** Crystal cell parameters of the two phases (perovskite and pyrochlore) from XRD refinement of PLZT and PLZT- 4 wt%Y2O3 ceramics


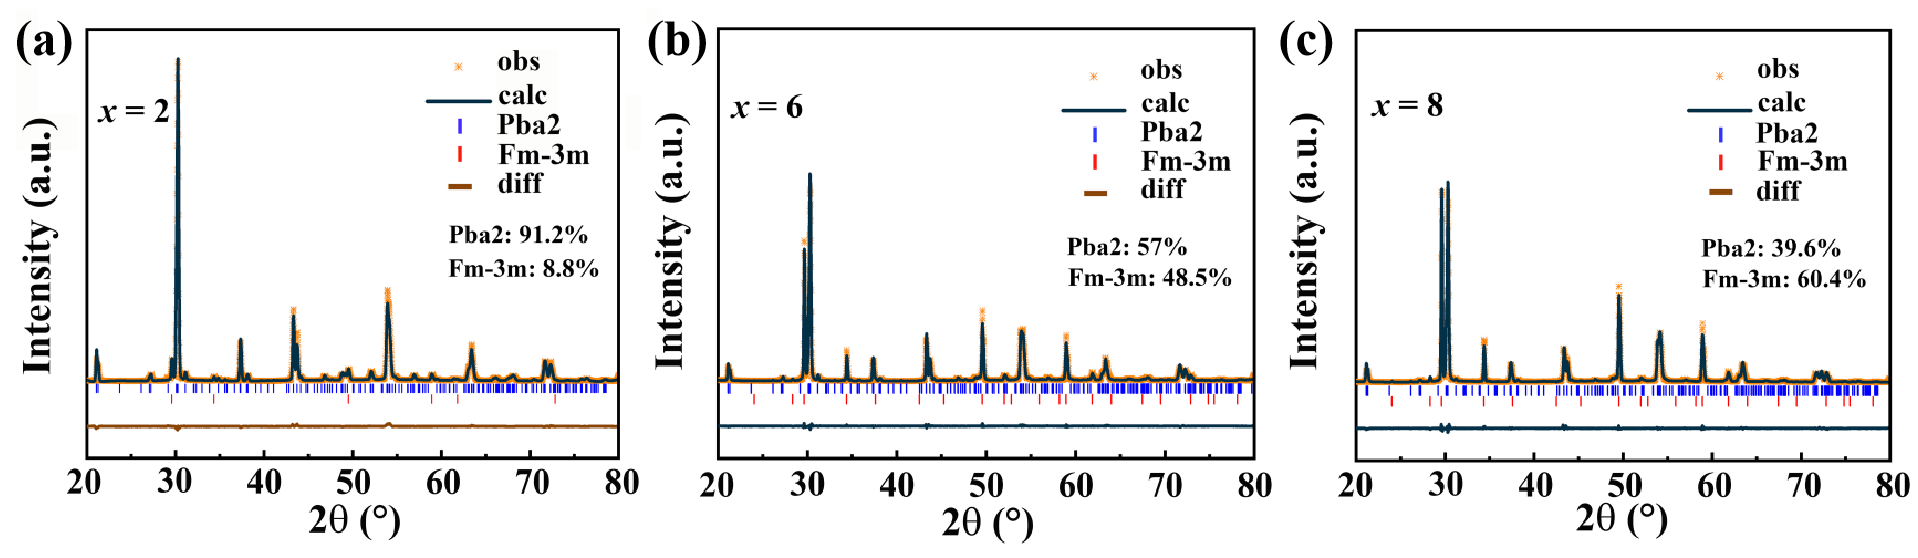
**Fig. S2.** (a) The XRD pattern of Y2 ceramics at room temperature; (b) The XRD pattern of Y6 ceramics at room temperature; (c) The XRD pattern of Y8 ceramics at room temperature.


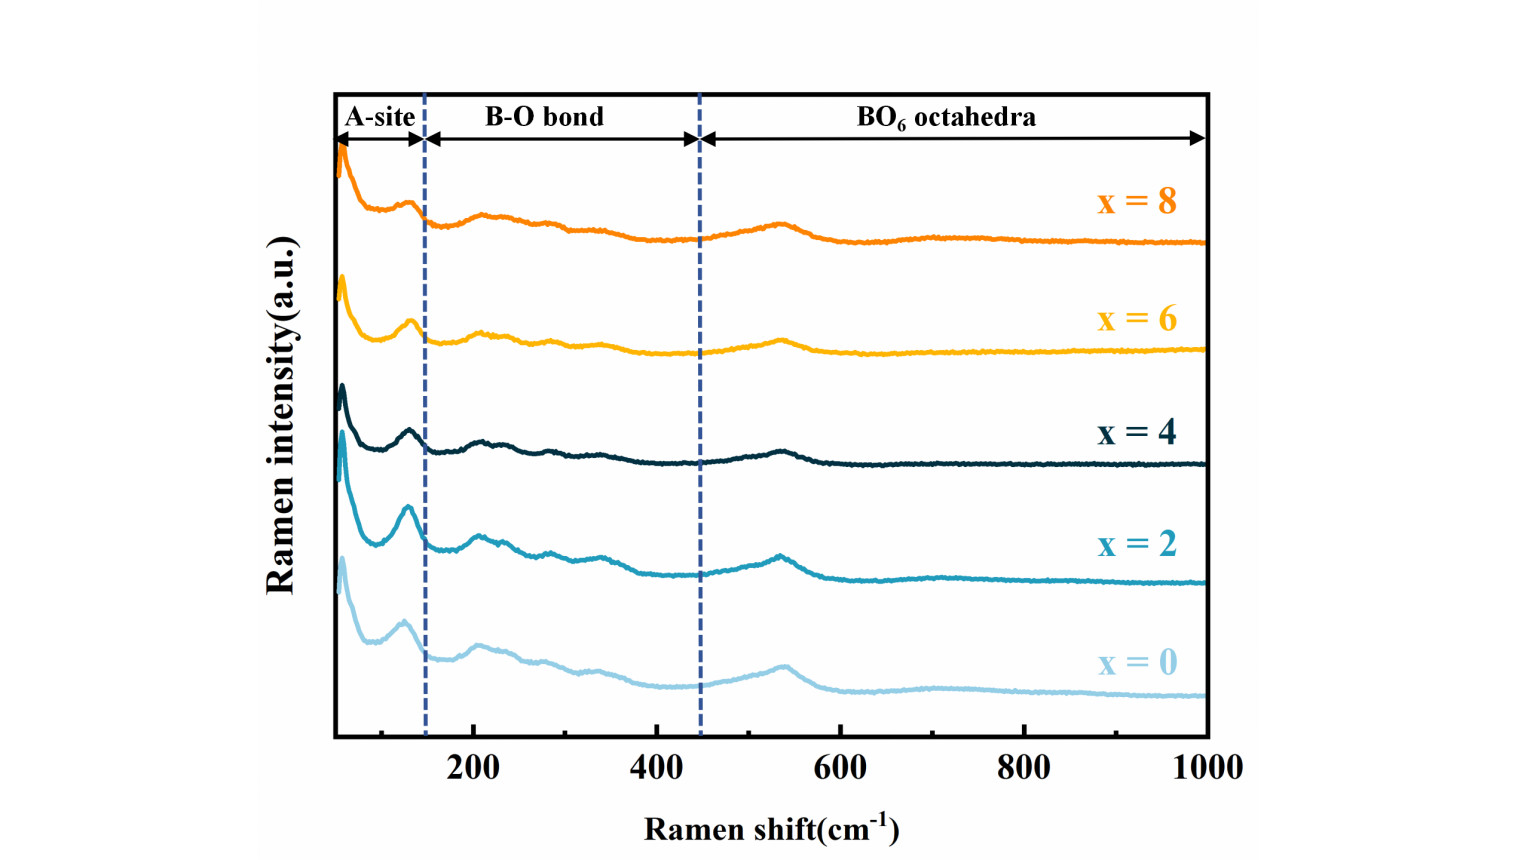


**Fig. S3.** The Raman pattern of Pb0.94La0.04Zr0.99Ti0.01O3- *x* wt%Y2O3 at room temperature.


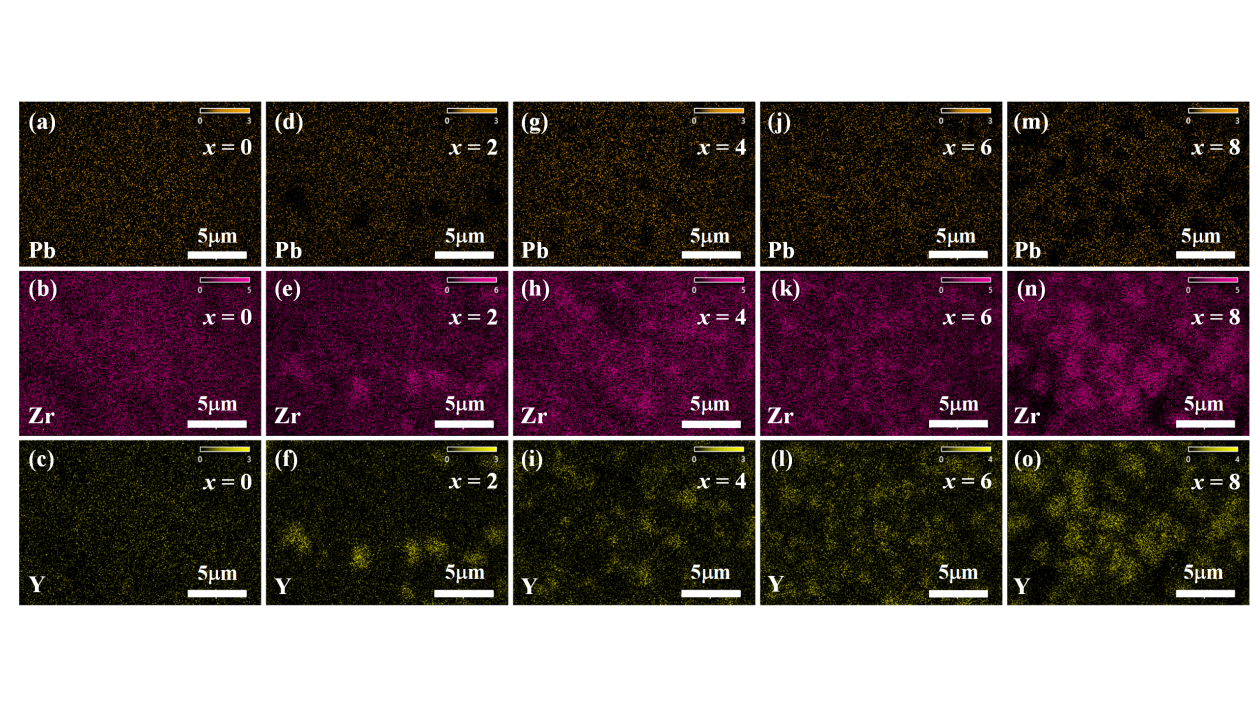
**Fig. S4.** (a) - (c)The EDS of Pb, Zr and Y elements in Y0 ceramics;(d) - (f)The EDS of Pb, Zr and Y elements in Y2 ceramics; (g) - (i)The EDS of Pb, Zr and Y elements in Y4 ceramics; (j) - (l)The EDS of Pb, Zr and Y elements in Y6 ceramics; (m) - (o)The EDS of Pb, Zr and Y elements in Y8 ceramics.





**Fig. S5.** The current-voltage curve (I-V) of Pb0.94La0.04Zr0.99Ti0.01O3- *x* wt%Y2O3.
